# Supplementary material for: CRISPR/Cas9‐mediated somatic correction of a novel coagulator factor IX gene mutation ameliorates hemophilia in mouse
Source: PubMed Central journal article supplement (PMC5125832; doi:10.15252/emmm.201506039), 2016-03-10
Supplement: EMMM-8-477-s001.pdf [file EMMM-8-477-s001.pdf]

**CRISPR/Cas9 mediated somatic correction of a novel coagulator factor IX gene  
mutation ameliorates hemophilia in mouse**

**Supplementary Information List**

**Table of Contents**

|                         |          |
|-------------------------|----------|
| <b>Appendix Figures</b> | <b>5</b> |
| <b>Appendix Tables</b>  | <b>6</b> |

**A**

|           | <u>PAM</u> | <u>sgRNA</u>            |              |
|-----------|------------|-------------------------|--------------|
| WT        | GGCTTCCAT  | TCTTCAGTACCTTAGAGTTCC   |              |
| F0 No. #1 | GGCTTCCAT  | TCTTCAGTACCTTAGAGTTCC . | -1bp         |
| #2        | GGCTTCCAT  | TCTTCAGTACCTTAGAGTTCC   |              |
| #3        | GGCTTCCAT  | TCTTCAGTACCTTAGAGTTCC   |              |
| #4        | GGCTTCCAT  | TCTTCAGTACCTTAGAGTTCC   |              |
| #5        | GGCTTCCAT  | TCTTCAGTACCTTAGAGTTCC   |              |
| #6        | GGCTTCCAT  | TCTTCAGTACCTTAGAGTTCC   |              |
| #7        | GGCTTCCAT  | TCTTCAGTACCTTAGAGTTCC   |              |
| #8        | GGCTTCCAT  | TCTTCAGTACCTTAGAGTTCC   |              |
| #9        | GGCTTCCAT  | TCTTCAGTACCTTAGAGTTCC   |              |
| #10       | GGCTTCCAT  | TCTTCAGTACCTTAGAGTTCC   |              |
| #11       | GGCTTCCAT  | TCTTCAGTACCTTAGAGTTCC   |              |
| #12       | GGCTTCCAT  | TCTTCAGTACCTTAGAGTTCC   |              |
| #13       | GGCTTCCAT  | TCTTCAGTCCCTTAGAGTTCC   | A>C mutation |
| #14       | GGCTTCCAT  | TCTTCAGTCCCTTAGAGTTCC   | A>C mutation |
| #15       | GGCTTCCAT  | TCTTCAGTACCTTAGAGTTCC   |              |
| #16       | GGCTTCCAT  | TCTTCAGTACCTTAGAGTTCC   |              |
| #17       | GGCTTCCAT  | TCTTCAGTACCTTAGAGTTCC   |              |
| #18       | GGCTTCCAT  | TCTTCAGTACCTTAGAGTTCC   |              |
| #19       | GGCTTCCAT  | TCTTCAGTACCTTAGAGTTCC   |              |
| #20       | GGCTTCCAT  | TCTTCAGTACCTTAGAGTTCC   |              |
| #21       | GGCTTCCAT  | TCTTCAGTCCCTTAGAGTTCC   | A>C mutation |

**B**

|           | <u>PAM</u> | <u>sgRNA</u>                                                                          |                 |
|-----------|------------|---------------------------------------------------------------------------------------|-----------------|
| WT        | GGCTTCCAT  | TCTTCAGTACCTTAGAGTTCC                                                                 |                 |
| F0 No. #1 | GGCTTCCAT  | TCT . CAGTACCTTAGAGTTCC                                                               | -1bp            |
| #2        | GGCTTCCAT  | TCTTCAGTACCTT <span style="border: 1px solid red; padding: 0 2px;">T . AG</span> TTCC | -1bp Stop codon |
| #3        | GGCTTCCAT  | TCTTCAGTACCTTAGAGTTCC                                                                 |                 |
| #4        | GGCTTCCAT  | TCTTCAGTACCTTAGAGTTCC                                                                 |                 |
| #5        | GGCTTCCAT  | TCTTCAGTACCTTAGAGTTCC                                                                 |                 |
| #6        | GGCTTCCAT  | TCTTCAGTACCTTAGAGTTCC                                                                 |                 |
| #7        | GGCTTCCAT  | TCTTCAGTACCTTAGAGTTCC                                                                 |                 |
| #8        | GGCTTCCAT  | T <span style="color: red;">CG</span> . CAGTACCTTAGAGTTCC                             | -1bp            |
|           | GGCTTCCAT  | T C . . . AGTACCTTAGAGTTCC                                                            | -3bp            |
| #9        | GGCTTCCAT  | TCTTCAGTACCTTAGAGTTCC                                                                 |                 |
| #10       | GGCTTCCAT  | TCTTT <span style="color: red;">T</span> CAGTACCTTAGAGTTCC                            | +1bp            |
| #11       | GGCTTCCAT  | TCTTCAGTACCTTAGAGTTCC                                                                 |                 |
| #12       | GGCTTCCAT  | TCTTCAGTACCTTAGAGTTCC                                                                 |                 |
| #13       | GGCTTCCAT  | T . . . CAGTACCTTAGAGTTCC                                                             | -3bp            |
| #14       | GGCTTCCAT  | TCTTCAGTACCTTAGAGTTCC                                                                 |                 |
| #15       | GGCTTCCAT  | TCTTCAGTACCTTAGAGTTCC                                                                 |                 |
| #16       | GGCTTCCAT  | TCTTCAG <span style="color: red;">G</span> ACCTTAGAGTTCC                              | T>G mutation    |

### Appendix Figure S1. Generation of variant mouse strains with *F9* mutation via Cas9-mediated genome editing.

**A** The founder sequences of *F9*<sup>Y381S</sup> mouse strain are shown. Nucleotide substitutions were indicated by a red letter. **B** The founder sequences of *F9*<sup>Y381D</sup> and *F9*<sup>382Stop</sup> strains are shown. Nucleotide substitutions were indicated by a red letter and deletions by dots; premature stop codon is boxed in red.

**A**

|      | sequence                 | score | UCSC gene    | locus           |
|------|--------------------------|-------|--------------|-----------------|
| OT1  | CCTTTCTTCAGAACCATAGAGAT  | 1.4   | NM_001164818 | chr2:-156393557 |
| OT2  | CTTTTCTTCAGTACCTGAGTTTA  | 0.9   | NM_007882    | chr18:-20146875 |
| OT3  | CTCTTCTTCAGGACCTGAAAGTT  | 0.9   | NM_001033460 | chr5:+30657485  |
| OT4  | CTTCTCTTCAGTACCATATGGTT  | 0.7   | NM_177184    | chr9:-67795908  |
| OT5  | CTCTTCTTCAGTAAGTAAGGGTT  | 0.5   | NM_175089    | chr8:+63578702  |
| OT6  | CTCTTCTTCAGAACCCTGATATTT | 0.5   | NM_001080924 | chr11:-5238542  |
| OT7  | CCGTTCTTCAGAACCCTTGGGCT  | 0.4   | NR_102726    | chr1:-173531247 |
| OT8  | CTGTCCTTCAGCACCTTAAAGGT  | 0.3   | NM_025281    | chr5:+38625321  |
| OT9  | CCATTCTTCACTACATCAGAATT  | 0.2   | NM_027823    | chr9:+8995857   |
| OT10 | CTATTCATCAGAACCCTTGGATT  | 0.2   | NM_194055    | chr4:+11294015  |

**B**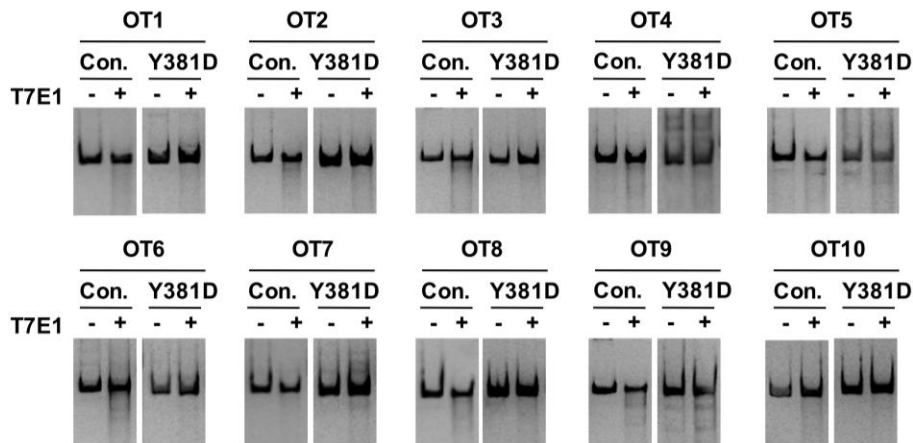**Appendix Figure S2. Off-target analysis of the sgRNA used for generation of *F9* mutant mice.**

**A** The 10 most likely potential off-target sites predicted by Optimized CRISPR Design website (<http://crispr.mit.edu/>) are listed with their sequence, score, gene ID and genomic locus. **B** T7E1 assays were performed with PCR products from the founder mouse of the *F9*<sup>Y381D</sup> strain. No off-target mutation was detected by sequencing of 50 TA-clones of each PCR product.

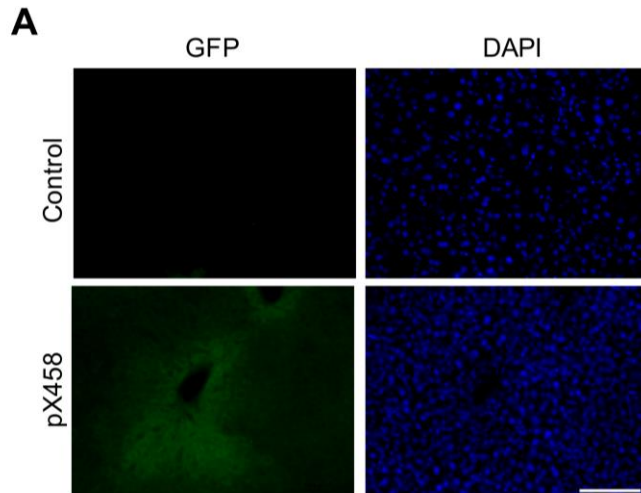

| ROIs           | Positive | Total  | Ratio |
|----------------|----------|--------|-------|
| 1              | 228      | 929    | 24.5% |
| 2              | 341      | 1136   | 30.0% |
| 3              | 210      | 1022   | 20.5% |
| 4              | 360      | 1607   | 22.4% |
| 5              | 39       | 942    | 4.1%  |
| 6              | 105      | 987    | 10.6% |
| 7              | 270      | 1185   | 22.8% |
| 8              | 111      | 1052   | 10.6% |
| <b>Average</b> | 208      | 1107.5 | 18.2% |

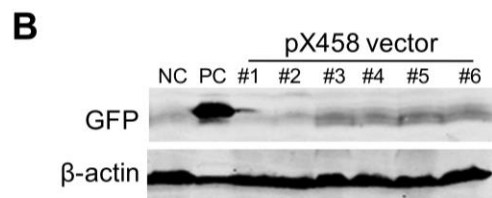

**Appendix Figure S3. Expression of Cas9-2A-GFP protein in liver tissue from mice 20h after hydrodynamic injection of 120  $\mu$ g pX458 construct.**

**A** Frozen sections were prepared from mouse liver tissues with or without plasmid DNA treatment. Upper panel: the sections were stained with 2-(4-Amidinophenyl)-6-indolecarbamide dihydrochloride (DAPI) and fluorescence images were taken with a microscope. Scale bar: 100 $\mu$ m. Lower panel: list of individual region of interests (ROIs). In each ROI, the GFP positive and total cell numbers were counted and the average percentage of GFP signals was calculated. **B** GFP expression was detected through western blotting with antibodies against GFP.  $\beta$ -actin was used as an internal loading control. NC: negative control without plasmid injection; PC: positive control of 293T cells transfected with pX458. The other lanes are individual mice that received pX458 through hydrodynamic tail vein injection.

**A**

|      | sequence                 | score | UCSC gene    | locus            |
|------|--------------------------|-------|--------------|------------------|
| OT1  | CCATTCTTCAGTACCTTAGAGTT  | 49.2  | NM_007979    | chrX:-57282327   |
| OT2  | CTCTTCTTCAGGACCTGAAAGTT  | 3.7   | NM_001033460 | chr5:+30657485   |
| OT3  | CCTTTCTTCAGAACCATAGAGAT  | 1.4   | NM_001164818 | chr2:-156393557  |
| OT4  | CTCTTCTTCAGGACCTCAAAGAC  | 0.9   | NM_011086    | chr1:-65301691   |
| OT5  | CTTTTCTTCAGGGCCTTAAAATA  | 0.8   | NM_013930    | chr6:-23024686   |
| OT6  | CCATTCTTCATGAGCTCAGAGTT  | 0.6   | NM_001165944 | chr10:-129403721 |
| OT7  | CCCTTCTTCATGAGCTTAGGGTG  | 0.5   | NM_011439    | chr1:+135279172  |
| OT8  | CCATTCTTCAGGCCCATGGAGTG  | 0.5   | NM_182745    | chr5:+107974825  |
| OT9  | CTCTTCTTCAGAACCCTGATATTT | 0.5   | NM_001080924 | chr11:-5238542   |
| OT10 | CCGTTCTTCAGAACCCTTGGGCT  | 0.4   | NR_102726    | chr1:-173531247  |

**B**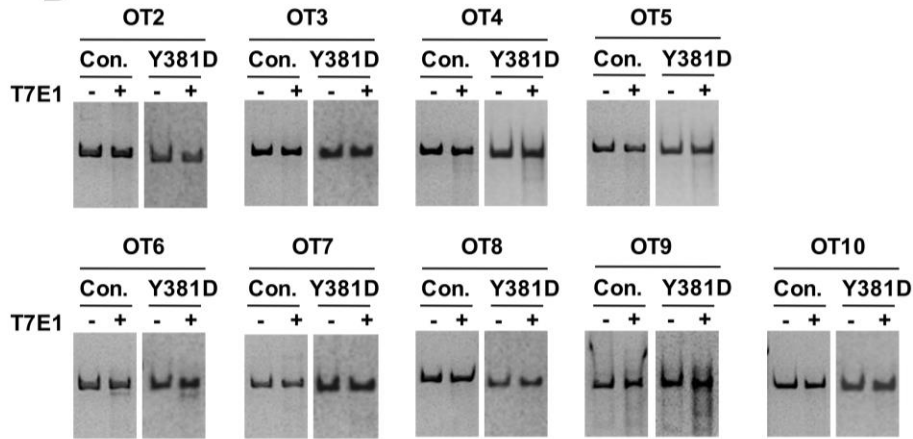

**Appendix Figure S4. Off-target analysis of the sgRNA used for correction of the F9<sup>Y381D</sup> mutation in mice.**

**A** The 10 most likely potential off-target sites predicted by Optimized CRISPR Design website (<http://crispr.mit.edu/>) software are listed with their sequence, score, gene ID and genomic locus. **B** T7E1 assays were performed with PCR products amplified from DNA extracted from liver tissues of the mice treated with  $1 \times 10^{10}$  and  $7 \times 10^{10}$  vector genomes of AdvCas9 and AdvG/T, respectively. No off-target mutation was detected by sequencing of 50 TA-clones of each of 9 PCR products.

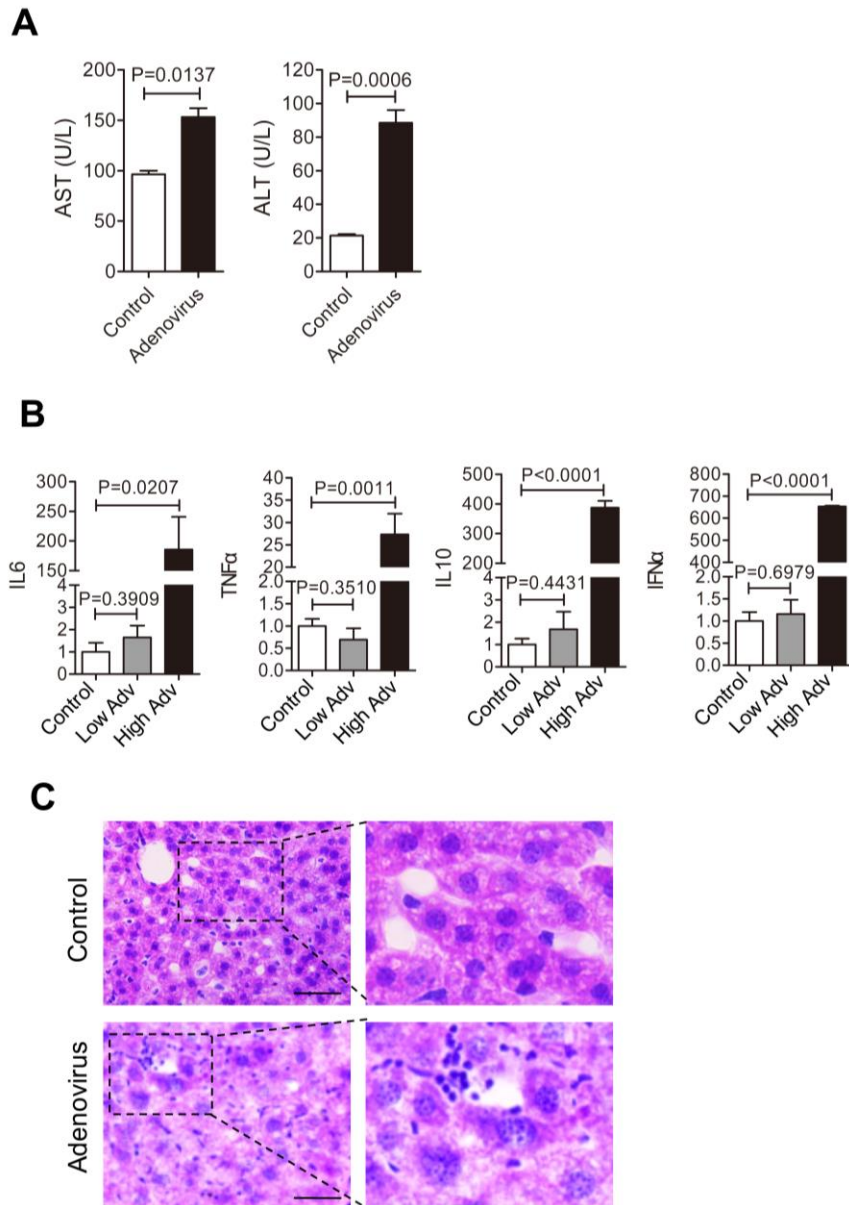

**Appendix Figure S5. Liver damage was evaluated through molecular and histological studies.**

**A** Aspartate aminotransferase (AST) and alanine aminotransferase (ALT) were tested in peripheral blood from F9<sup>Y381D</sup> mice treated with or without  $1 \times 10^{10}$  and  $7 \times 10^{10}$  vector genomes of AdvCas9 and AdvG/T for 8 weeks (n=5). **B** mRNA levels of inflammatory cytokines were determined by qRT-PCR. mRNA samples were harvested in control or Adv treated mice described in (A). **C** Typical H&E staining images of liver tissues from mice treated with or without Adv. Scale bar=100µm.

**Appendix Table S1** sgRNA sequences.

| ID                  | Sequence (5'-3')     |
|---------------------|----------------------|
| F9 <sup>WT</sup>    | CTCTAAGGTACTGAAGAA   |
| F9 <sup>Y381D</sup> | AACTCTAAGGTCCTGAAGAA |

**Appendix Table S2** ssODN sequences.

| ID                         | Sequence (5'-3')                                                                                                                   |
|----------------------------|------------------------------------------------------------------------------------------------------------------------------------|
| F9 T>G                     | TGGCTGGGGAAAAGTCTTCAACAAAGGGAGACAGGCTT<br>CCATTCTTCAGGACCTTAGAGTTCCACTGGTGGATAGAG<br>CCACATGCCTTAGGTCCACAAC                        |
| F9 A>C                     | GGCTGGGGAAAAGTCTTCAACAAAGGGAGACAGGCTTC<br>CATTCTTCAGTCCCTTAGAGTTCCACTGGTGGATAGAGCC<br>ACATGCCTTAGGTCCACAACA                        |
| F9 <sup>Y381D</sup><br>G>T | TGTCAGTGGCTGGGGAAAAGTCTTCAACAAAGGGAGAC<br>AGGCTTCCATTCTTCAGTACCTTAGAGTTCCACTGGTGGAA<br>TAGAGCCACATGCCTTAGGTCCACAACATTCATCTAT<br>AA |

**Appendix Table S3** primer sequences for off target analysis of sgRNA for generation of F9<sup>Y381D</sup> mutant mice.

| ID       | Sequence (5'-3')         |
|----------|--------------------------|
| F9-OT1-F | GGTGACAAGGAAGATGATGGG    |
| F9-OT1-R | CAGAAGGACTCCAGAGTACAGC   |
| F9-OT2-F | CCATTAGCTCTTCAGTCGTGG    |
| F9-OT2-R | CTCTAGTGTCTGGTACACTGATGC |
| F9-OT3-F | CAGAGCTGGGCTATGCATGTATAG |
| F9-OT3-R | CTGCCGTATCTGCTTGGTGTAT   |
| F9-OT4-F | GTCTGTGTACCATATGCATGCC   |
| F9-OT4-R | AGCAAGTTGTCCTACACCTCCC   |
| F9-OT5-F | GTTGCAACAATCAGAGTTGGGG   |
| F9-OT5-R | GGGCCTTTTGGGATAGCATT     |
| F9-OT6-F | GGCCCCAAAGATGTAAGGTACAG  |
| F9-OT6-R | TCTTAGATGCACCCACTAGGCCT  |
| F9-OT7-F | GTCTGCTCATCCGCTGGTTCTA   |
| F9-OT7-R | CTCTGACTTCAAACCTCAGGAGCC |
| F9-OT8-F | CTGAGGCAGCTGCTTATCTTC    |
| F9-OT8-R | AACAACACCCCAACCTCATC     |

|           |                         |
|-----------|-------------------------|
| F9-OT9-F  | CCTTGACCAAGGAGCTTAGCA   |
| F9-OT9-R  | GCCATCGTCATTAACAGGAGTG  |
| F9-OT10-F | AGACAGACAGGAAGGCTATAGGA |
| F9-OT10-R | GTCATGCTGGGATTTAATCCC   |

**Appendix Table S4** primer sequences for off target analysis of *in vivo* genome editing sgRNA of F9<sup>Y381D</sup> mutant mice.

| <b>ID</b>                   | <b>Sequence (5'-3')</b>  |
|-----------------------------|--------------------------|
| F9 <sup>Y381D</sup> -OT2-F  | GTGGATACATGCATGTGAGTGG   |
| F9 <sup>Y381D</sup> -OT2-R  | ACCGGTTTCAGTTTCCTCTTCTG  |
| F9 <sup>Y381D</sup> -OT3-F  | CAGGTGACAAGGAAGATGATGG   |
| F9 <sup>Y381D</sup> -OT3-R  | CTCCAAGGAAACAAGAGGAACC   |
| F9 <sup>Y381D</sup> -OT4-F  | CACTGGCAAAGATACTTCTGGG   |
| F9 <sup>Y381D</sup> -OT4-R  | AAACCAGGGGAAAGGCAGTT     |
| F9 <sup>Y381D</sup> -OT5-F  | GAGCAAATGTCTGTCTGCCAGA   |
| F9 <sup>Y381D</sup> -OT5-R  | CCATTCTGAGGTCTTGTGACTGAG |
| F9 <sup>Y381D</sup> -OT6-F  | CTTATGGTCTTGAGCTGTACCAGC |
| F9 <sup>Y381D</sup> -OT6-R  | GAATGGGTTGTTCTTCTCACAGG  |
| F9 <sup>Y381D</sup> -OT7-F  | GCTGTATCCTCTGGGTGTTTGT   |
| F9 <sup>Y381D</sup> -OT7-R  | GGAGAGAAATAGGGTCAACAGC   |
| F9 <sup>Y381D</sup> -OT8-F  | CACACCTGGCTTGAAAGGTT     |
| F9 <sup>Y381D</sup> -OT8-R  | CAACTCTGGTCACCCTGACTTAA  |
| F9 <sup>Y381D</sup> -OT9-F  | TTAGATGCACCCACTAGGCCTA   |
| F9 <sup>Y381D</sup> -OT9-R  | GATTATTGAGTATGGCCCCAGG   |
| F9 <sup>Y381D</sup> -OT10-F | TTCAAACCTCAGGAGCCTCCAGA  |
| F9 <sup>Y381D</sup> -OT10-R | GTCATCCGCTGGTTCTAATGT    |

**Appendix Table S5** primer sequences for sequencing and T7E1 assay.

| <b>ID</b> | <b>Sequence (5'-3')</b> |
|-----------|-------------------------|
| F9-F1     | TCGAACTATCCCTCATCACCAG  |
| F9-R1     | GTCTGTAAAGGGCATCACCCAT  |
| F9-F2     | GAACCCATAAAGCACTCTCAGC  |
| F9-R2     | GGCTGGACTTACAGAAATGGTG  |
| F9-F3     | CTTCCTCAAGTTTGGTTCTGGC  |
| F9-R3     | CTTCACACGAATCTTTGCCTCC  |



**Appendix Table S6** primer sequences for QPCR.

| <b>ID</b>       | <b>Sequence (5'-3')</b>   |
|-----------------|---------------------------|
| IL6-F           | GGGACTGATGCTGGTGACAA      |
| IL6-R           | ACAGGTCTGTTGGGAGTGGT      |
| TNF $\alpha$ -F | AGAGCTACAAGAGGATCACCAGCAG |
| TNF $\alpha$ -R | TCAGATTTACGGGTCAACTTCACAT |
| IL10-F          | GCTCTTACTGACTGGCATGAG     |
| IL10-R          | CGCAGCTCTAGGAGCATGTG      |
| actin-F         | CGTCATACTCCTGCTTGCTG      |
| actin-R         | GTACGCCAACACAGTGCTG       |
