# Supplementary material for: CRISPR/Cas9‐mediated somatic correction of a novel coagulator factor IX gene mutation ameliorates hemophilia in mouse
Source: PubMed Central journal article supplement (PMC5125832; doi:10.15252/emmm.201506039), 2016-03-10

Figure 4C

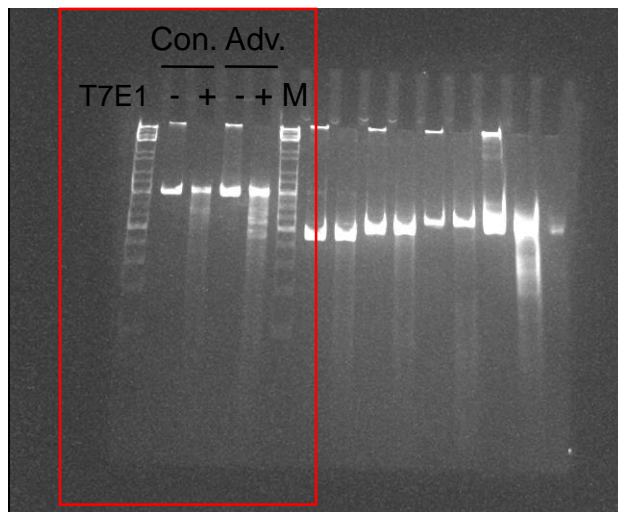

Supplement: EMMM-8-477-s004.pdf [file EMMM-8-477-s004.pdf]
